# Supplementary material
Source: Royal Society of Chemistry journal article supplement (doi:10.1039/d6ay00186f)
Supplement: d6ay00186f1.pdf [file d6ay00186f1.pdf]

**Table S1** UPLC-MS/MS identification (MRM) of C3G/C3R and its metabolites

| Metabolites | Retention time (min) | Parent ion (m/z) | Product ion (m/z) | Collision energy (eV) | Cone voltage (V) |
|-------------|----------------------|------------------|-------------------|-----------------------|------------------|
| C3G         | 2.16                 | 449              | 287.18/137.1      | 25                    | 30               |
| C3R         | 2.18                 | 595.2            | 287.18/449        | 30                    | 30               |
| PCA         | 2.10                 | 153.12           | 109/80.87         | 25                    | 30               |
| 4-HBA       | 2.42                 | 137.1            | 93.01/64.48       | 15                    | 20               |
| pCA         | 2.69                 | 163.08           | 119.1             | 20                    | 25               |
| VA          | 2.48                 | 167.1            | 152.1             | 25                    | 30               |
| IS          | 3.03                 | 182.16           | 138.1             | 25                    | 30               |

**Table S2** UPLC elution gradient program

| Time (min) | Flow (mL/min) | %A (0.1% Formic acid) | %B (Methanol) |
|------------|---------------|-----------------------|---------------|
| 0          | 0.25          | 90                    | 10            |
| 2.5        | 0.25          | 10                    | 90            |
| 4.0        | 0.25          | 10                    | 90            |
| 5.0        | 0.25          | 90                    | 10            |
| 7.0        | 0.25          | 90                    | 10            |

**Table S3** Room temperature stability of the two anthocyanins and their metabolites (n=3)

| Level | Time/<br>h | Room temperature stability |          |               |          |               |          |                 |          |               |          |              |          |
|-------|------------|----------------------------|----------|---------------|----------|---------------|----------|-----------------|----------|---------------|----------|--------------|----------|
|       |            | C3G/<br>ng/mL              | PC/<br>% | C3R/<br>ng/mL | PC/<br>% | PCA/<br>ng/mL | PC/<br>% | 4-HBA/<br>ng/mL | PC/<br>% | pCA/<br>ng/mL | PC/<br>% | VA/<br>ng/mL | PC/<br>% |
| LQC   | 0          | 5.05                       | 100.00   | 3.11          | 100.00   | 3.14          | 100.00   | 5.19            | 100.00   | 4.75          | 100.00   | 36.74        | 100.00   |
|       | 2          | 4.47                       | 88.49    | 2.99          | 96.01    | 2.82          | 89.81    | 4.87            | 93.86    | 4.46          | 93.91    | 35.91        | 97.73    |
|       | 4          | 4.54                       | 89.90    | 2.97          | 95.22    | 2.79          | 88.68    | 4.74            | 91.48    | 4.20          | 88.43    | 34.12        | 92.86    |
|       | 6          | 4.48                       | 88.70    | 2.98          | 95.85    | 2.64          | 84.07    | 4.77            | 91.89    | 4.19          | 88.29    | 33.49        | 91.14    |
|       | 8          | 4.26                       | 84.33    | 2.83          | 90.99    | 2.63          | 83.83    | 4.21            | 81.14    | 4.11          | 86.57    | 32.01        | 87.11    |
|       | 10         | 4.24                       | 83.88    | 2.73          | 87.55    | 2.66          | 84.73    | 4.27            | 82.33    | 3.95          | 83.24    | 30.76        | 83.73    |
|       | 12         | 4.20                       | 83.21    | 2.73          | 87.78    | 2.56          | 81.39    | 4.22            | 81.40    | 4.07          | 85.58    | 30.88        | 84.05    |
| MQC   | 0          | 15.43                      | 100.00   | 5.76          | 100.00   | 11.94         | 100.00   | 15.02           | 100.00   | 9.86          | 100.00   | 107.04       | 100.00   |
|       | 2          | 13.33                      | 86.35    | 5.55          | 96.35    | 10.83         | 90.68    | 14.43           | 96.08    | 9.12          | 92.45    | 97.90        | 91.46    |
|       | 4          | 13.27                      | 85.99    | 5.33          | 92.56    | 10.70         | 89.59    | 13.15           | 87.58    | 8.92          | 90.44    | 93.56        | 87.40    |
|       | 6          | 14.03                      | 90.92    | 5.31          | 92.14    | 10.33         | 86.54    | 12.93           | 86.08    | 8.86          | 89.85    | 95.58        | 89.29    |
|       | 8          | 13.09                      | 84.81    | 5.17          | 89.75    | 9.93          | 83.17    | 12.66           | 84.29    | 8.47          | 85.92    | 89.05        | 83.19    |
|       | 10         | 13.00                      | 84.25    | 5.09          | 88.35    | 9.95          | 83.31    | 12.83           | 85.39    | 8.28          | 83.94    | 88.68        | 82.84    |
|       | 12         | 12.69                      | 82.25    | 4.89          | 84.80    | 10.35         | 86.66    | 12.70           | 84.58    | 8.35          | 84.73    | 89.41        | 83.52    |
| HQC   | 0          | 74.07                      | 100.00   | 24.83         | 100.00   | 120.76        | 100.00   | 63.17           | 100.00   | 33.98         | 100.00   | 226.44       | 100.00   |
|       | 2          | 66.19                      | 89.36    | 24.29         | 97.82    | 112.75        | 93.37    | 59.53           | 94.24    | 32.97         | 97.04    | 221.88       | 97.98    |
|       | 4          | 64.91                      | 87.63    | 23.71         | 95.51    | 110.13        | 91.19    | 59.87           | 94.78    | 33.17         | 97.63    | 219.42       | 96.90    |
|       | 6          | 62.89                      | 84.91    | 22.55         | 90.82    | 109.06        | 90.31    | 59.09           | 93.53    | 31.07         | 91.43    | 201.66       | 89.06    |
|       | 8          | 61.63                      | 83.21    | 21.12         | 85.07    | 104.64        | 86.65    | 53.12           | 84.09    | 28.86         | 84.94    | 187.58       | 82.84    |
|       | 10         | 63.00                      | 85.05    | 20.96         | 84.43    | 101.50        | 84.04    | 56.02           | 88.68    | 28.64         | 84.29    | 190.88       | 84.29    |
|       | 12         | 62.70                      | 84.65    | 21.02         | 84.65    | 101.62        | 84.15    | 52.16           | 82.57    | 28.93         | 85.13    | 191.17       | 84.42    |

PC/%: Percentage of remaining

**Table S4** Sample pool stability of the two anthocyanins and their metabolites (n=3)

| Level | Time/<br>h | Sample pool stability |          |               |          |               |          |                 |          |               |          |              |          |
|-------|------------|-----------------------|----------|---------------|----------|---------------|----------|-----------------|----------|---------------|----------|--------------|----------|
|       |            | C3G/<br>ng/mL         | PC/<br>% | C3R/<br>ng/mL | PC/<br>% | PCA/<br>ng/mL | PC/<br>% | 4-HBA/<br>ng/mL | PC/<br>% | ρCA/<br>ng/mL | PC/<br>% | VA/<br>ng/mL | PC/<br>% |
| LQC   | 0          | 7.25                  | 100.00   | 3.73          | 100.00   | 4.90          | 100.00   | 2.01            | 100.00   | 3.65          | 100.00   | 21.5         | 100.00   |
|       | 2          | 7.18                  | 99.01    | 3.72          | 99.88    | 4.54          | 92.76    | 1.87            | 93.29    | 3.50          | 95.82    | 20.61        | 95.89    |
|       | 4          | 6.88                  | 94.86    | 3.65          | 97.85    | 4.32          | 88.22    | 1.79            | 88.96    | 3.64          | 99.67    | 20.94        | 97.40    |
|       | 6          | 6.63                  | 91.33    | 3.54          | 95.09    | 4.25          | 86.88    | 1.75            | 87.27    | 3.48          | 95.24    | 20.57        | 95.67    |
|       | 8          | 6.33                  | 87.27    | 3.39          | 90.98    | 4.13          | 84.41    | 1.74            | 86.37    | 3.19          | 87.39    | 19.60        | 91.20    |
|       | 10         | 6.12                  | 84.34    | 3.35          | 89.93    | 4.07          | 83.20    | 1.76            | 87.53    | 3.24          | 88.89    | 18.33        | 85.27    |
|       | 12         | 6.34                  | 87.40    | 3.17          | 85.15    | 4.01          | 81.91    | 1.68            | 83.43    | 3.14          | 85.97    | 18.55        | 86.28    |
| MQC   | 0          | 13.82                 | 100.00   | 5.29          | 100.00   | 14.89         | 100.00   | 19.50           | 100.00   | 11.08         | 100.00   | 100.22       | 100.00   |
|       | 2          | 13.21                 | 95.53    | 5.12          | 96.80    | 14.36         | 96.40    | 19.12           | 98.07    | 11.02         | 99.45    | 95.38        | 95.17    |
|       | 4          | 12.60                 | 91.16    | 5.15          | 97.39    | 13.83         | 92.88    | 18.54           | 95.08    | 10.98         | 99.09    | 94.81        | 94.59    |
|       | 6          | 12.34                 | 89.28    | 5.11          | 96.52    | 13.17         | 88.44    | 17.91           | 91.84    | 10.11         | 91.27    | 91.54        | 91.33    |
|       | 8          | 11.86                 | 85.76    | 4.90          | 92.54    | 13.49         | 90.59    | 17.19           | 88.13    | 10.08         | 90.99    | 89.99        | 89.79    |
|       | 10         | 11.98                 | 86.66    | 4.69          | 88.59    | 12.98         | 87.13    | 16.50           | 84.63    | 9.51          | 85.84    | 85.31        | 85.12    |
|       | 12         | 11.63                 | 84.14    | 4.48          | 84.58    | 12.63         | 84.81    | 16.56           | 84.91    | 9.48          | 85.54    | 86.44        | 86.25    |
| HQC   | 0          | 47.73                 | 100.00   | 37.46         | 100.00   | 186.47        | 100.00   | 51.21           | 100.00   | 53.54         | 100.00   | 216.21       | 100.00   |
|       | 2          | 45.06                 | 94.42    | 34.47         | 92.00    | 175.84        | 94.30    | 50.69           | 98.97    | 49.67         | 92.78    | 211.24       | 97.70    |
|       | 4          | 44.43                 | 93.10    | 34.43         | 91.90    | 169.81        | 91.06    | 50.18           | 97.97    | 51.05         | 95.36    | 202.60       | 93.71    |
|       | 6          | 42.85                 | 89.77    | 34.77         | 92.83    | 175.04        | 93.87    | 47.84           | 93.42    | 47.45         | 88.63    | 201.10       | 93.01    |
|       | 8          | 40.32                 | 84.48    | 31.84         | 85.00    | 156.91        | 84.15    | 42.88           | 83.73    | 45.81         | 85.57    | 191.36       | 88.51    |
|       | 10         | 41.38                 | 86.70    | 31.44         | 83.94    | 159.92        | 85.76    | 42.78           | 83.54    | 47.30         | 88.34    | 191.06       | 88.37    |
|       | 12         | 41.94                 | 87.87    | 31.67         | 84.54    | 157.91        | 84.68    | 45.00           | 87.87    | 47.03         | 87.84    | 191.20       | 88.43    |

PC/%: Percentage of remaining
